# Supplementary material
Source: MDPI journal article supplement (https://www.mdpi.com/2227-7390/8/7/1169)
Supplement: s1 [file s1]

## Supplementary Materials

Table S1. Parameters of the myocardium cell model.

|                |                                                                                                                     |                                                             |
|----------------|---------------------------------------------------------------------------------------------------------------------|-------------------------------------------------------------|
| $a_0$          | Constant parameter                                                                                                  | 0.55 kN/m <sup>2</sup>                                      |
| $a_1$          | Constant parameter                                                                                                  | 3                                                           |
| $L_{s0}$       | Reference sarcomere length                                                                                          | 1.9 $\mu\text{m}$                                           |
| $E_{cb}$       | Crossbridge stiffness                                                                                               | 2.5 pN/nm                                                   |
| $N_M$          | Number of myosin filaments per unit cross-section area                                                              | $2.5 \cdot 10^{14}/\text{m}^2$                              |
| $N_{cb}$       | The number of myosin heads per a half of a thick filament                                                           | 300                                                         |
| $k_B$          | Boltzmann constant                                                                                                  | $1.38 \cdot 10^{-23} \text{ J/K}$                           |
| $T$            | Absolute temperature                                                                                                | 310 K                                                       |
| $L_p$          | Persistence length of titin molecule                                                                                | 8.4 nm                                                      |
| $L_c$          | Contour length of titin in sarcomere                                                                                | 350 nm                                                      |
| $h_r$          | Axial displacement of a crossbridge during transition from state 1 to state 2 at zero load                          | 10 nm                                                       |
| $f_{+}$        | Steady state kinetic rate at $\delta = 0$                                                                           | $75 \text{ s}^{-1}$                                         |
| $\Delta$       | Constant parameter                                                                                                  | 4                                                           |
| $\delta_0$     | Upper limit for $\delta$ during stretch                                                                             | 0.4                                                         |
| $b_{cb}$       | Constant parameter of the cross-bridge kinetics                                                                     | 1.5                                                         |
| $c_{cb}$       | Constant parameter of the cross-bridge kinetics                                                                     | 8.5                                                         |
| $c_{50}^0$     | Ca <sup>2+</sup> concentration half-saturating Tn at $l_{s0}$ in the absence of myosin heads in 'normal' myocardium | $2 \mu\text{mol} \cdot \text{L}^{-1}$                       |
| $c_{50}$       | Normalized Ca <sup>2+</sup> concentration half-saturating Tn at $l_{s0}$ in the absence of myosin heads             | 1                                                           |
| $\alpha_+$     | Rate constant of Ca <sup>2+</sup> binding to Tn multiplied by $c_{50}^0$                                            | $35 \text{ s}^{-1}$                                         |
| $k_s$          | Constant parameter                                                                                                  | 2                                                           |
| $k_n$          | Constant parameter                                                                                                  | 8                                                           |
| $C_{Tn}$       | Total concentration of Tn                                                                                           | $70 \mu\text{mol} \cdot \text{L}^{-1}$                      |
| $m$            | Hill parameter                                                                                                      | 3                                                           |
| $k_{1Ca}$      | Rate constant of accelerated Ca <sup>2+</sup> release                                                               | $15 \text{ s}^{-1}$                                         |
| $k_{2Ca}$      | Rate constant of deceleration of Ca <sup>2+</sup> release                                                           | $200 \text{ s}^{-1}$                                        |
| $I_{Ca}^0$     | Normalized maximal rate of Ca <sup>2+</sup> release from SR                                                         | $850 \text{ s}^{-1}$                                        |
| $c_0$          | Normalized Ca <sup>2+</sup> concentration at rest                                                                   | 0.05                                                        |
| $k_{BC}$       | Reciprocal to the buffer binding constant                                                                           | $1 \mu\text{mol} \cdot \text{L}^{-1}$                       |
| $B_{Ca}$       | Total concentration of Ca <sup>2+</sup> buffer in the cytosol                                                       | $100 \mu\text{mol} \cdot \text{L}^{-1}$                     |
| $\gamma_{1Ca}$ | The rate of the uptake into the sarcoplasmic reticulum                                                              | $300 \mu\text{mol} \cdot \text{L}^{-1} \cdot \text{s}^{-1}$ |
| $\gamma_{2Ca}$ | Parameter of the uptake into the sarcoplasmic reticulum                                                             | $0.1 \mu\text{mol} \cdot \text{L}^{-1}$                     |

Table S2. LV shape approximation parameters.

|           |                                                                           |         |
|-----------|---------------------------------------------------------------------------|---------|
| $r_{in}$  | Inner radius of the LV at its base in the near end-systolic configuration | 1.73 cm |
| $r_{out}$ | Outer radius of the LV at its base in the near end-systolic configuration | 2.78 cm |
| $h_{in}$  | Axial length of the LV cavity in the near end-systolic configuration      | 6.93 cm |
| $h_{out}$ | Full length of the LV cavity in the near end-systolic configuration       | 7.68 cm |
| $E$       | LV wall curvity parameter                                                 | 1.1     |

5 Table S3. Parameters of the hemodynamic model.

|            |                                                                      |                                          |
|------------|----------------------------------------------------------------------|------------------------------------------|
| $V_{0LA}$  | Unloaded steady-state volume of relaxed left atrium                  | 30 mL                                    |
| $V_{0RA}$  | Unloaded steady-state volume of relaxed right atrium                 | 30 mL                                    |
| $V_{0RV}$  | Unloaded steady-state volume of relaxed right ventricle              | 50 mL                                    |
| $E_{1LA}$  | Passive stiffness of the left atrium                                 | 10 dyn/cm <sup>2</sup>                   |
| $E_{1RA}$  | Passive stiffness of the right atrium                                | 0.41 dyn/cm <sup>2</sup>                 |
| $E_{1RV}$  | Passive stiffness of the right ventricle                             | 80 dyn/cm <sup>2</sup>                   |
| $E_{2LA}$  | Coefficient of exponential passive elasticity of the left atrium     | 0.15 mL <sup>-1</sup>                    |
| $E_{2RA}$  | Coefficient of exponential passive elasticity of the right atrium    | 0.15 mL <sup>-1</sup>                    |
| $E_{2RV}$  | Coefficient of exponential passive elasticity of the right ventricle | 0.025 mL <sup>-1</sup>                   |
| $E_{3LA}$  | Active pressure coefficient for the left atrium                      | 1.33·10 <sup>4</sup> dyn/cm <sup>2</sup> |
| $E_{3RA}$  | Active pressure coefficient for the right atrium                     | 1·10 <sup>4</sup> dyn/cm <sup>2</sup>    |
| $E_{3RV}$  | Active pressure coefficient for the right ventricle                  | 11.3·10 <sup>4</sup> dyn/cm <sup>2</sup> |
| $\mu_{a1}$ | Passive viscosity of the atria                                       | 1 s/mL                                   |
| $\mu_{a2}$ | Active viscosity of the atria                                        | 1 dyn·s/cm <sup>5</sup>                  |
| $\mu_v$    | Active viscosity of the right ventricle                              | 50 dyn·s/cm <sup>5</sup>                 |
| $R_{iLV}$  | Hydraulic resistance of the mitral valve                             | 4 dyn·s/cm <sup>5</sup>                  |
| $R_{oLV}$  | Hydraulic resistance of the aortic valve                             | 20 dyn·s/cm <sup>5</sup>                 |
| $R_A$      | Hydraulic resistance of the systemic arteries                        | 10 dyn·s/cm <sup>5</sup>                 |
| $R_{iRA}$  | Hydraulic resistance of the systemic veins                           | 4 dyn·s/cm <sup>5</sup>                  |
| $R_{iRV}$  | Hydraulic resistance of the tricuspid valve                          | 2 dyn·s/cm <sup>5</sup>                  |
| $R_{oRV}$  | Hydraulic resistance of the pulmonary valve                          | 10 dyn·s/cm <sup>5</sup>                 |
| $R_{iLA}$  | Hydraulic resistance of the pulmonary veins                          | 8 dyn·s/cm <sup>5</sup>                  |
| $R_C$      | Viscoelastic resistance of the walls of the large systemic vessels   | 60 dyn·s/cm <sup>5</sup>                 |
| $R_{per}$  | Peripheral resistance of the systemic circulation                    | 1600 dyn·s/cm <sup>5</sup>               |

|                                |                                                                                                   |                                                                                                                 |
|--------------------------------|---------------------------------------------------------------------------------------------------|-----------------------------------------------------------------------------------------------------------------|
| $R_{perPulm}$                  | Peripheral resistance of the pulmonary circulation                                                | 230 dyn·s/cm <sup>5</sup>                                                                                       |
| $L_{iLV}$                      | Inertial resistance of the mitral valve                                                           | 0.5 dyn·s <sup>2</sup> /cm <sup>5</sup>                                                                         |
| $L_{oLV}$                      | Inertial resistance of the aortic valve                                                           | 0.01 dyn·s <sup>2</sup> /cm <sup>5</sup>                                                                        |
| $L_A$                          | Inertial resistance of the flow in the systemic arteries                                          | 2.5 dyn·s <sup>2</sup> /cm <sup>5</sup>                                                                         |
| $L_{oRV}$                      | Inertial resistance of the pulmonary valve                                                        | 0.01 dyn·s <sup>2</sup> /cm <sup>5</sup>                                                                        |
| $C_{LV}$                       | Non-sarcomeric compliance of the LV                                                               | 2·10 <sup>-5</sup> cm <sup>5</sup> /dyn                                                                         |
| $C_{A1}$                       | Aorta compliance                                                                                  | 4·10 <sup>-4</sup> cm <sup>5</sup> /dyn                                                                         |
| $C_{A2}$                       | Compliance of the systemic arteries                                                               | 1·10 <sup>-4</sup> cm <sup>5</sup> /dyn                                                                         |
| $C_V$                          | Compliance of the systemic veins                                                                  | 0.05 cm <sup>5</sup> /dyn                                                                                       |
| $C_{APulm}$                    | Compliance of the pulmonary arteries                                                              | 3.5·10 <sup>-3</sup> cm <sup>5</sup> /dyn                                                                       |
| $C_{VPulm}$                    | Compliance of the pulmonary veins                                                                 | 0.01 cm <sup>5</sup> /dyn                                                                                       |
| $C_C$                          | Coefficient that characterizes elastic component of arterial viscoelasticity                      | 1·10 <sup>-3</sup> cm <sup>5</sup> /dyn                                                                         |
| $C_{sq}$                       | Coefficient of the quadratic hydraulic valve resistance                                           | 1.5 dyn·s <sup>2</sup> /cm <sup>4</sup> (mitral valve),<br>1 dyn·s <sup>2</sup> /cm <sup>4</sup> (aortic valve) |
| $b_0, b_1, b_2, b_3, b_4, b_5$ | Coefficients of the dependence of the quadratic hydraulic valve resistance on the Reynolds number | 0.4614, -0.2648, 0.203, -0.066,<br>0.0132, -0.001                                                               |

Table S4. Values of the parameters for the regulation block of the myocardium cell-model for the simulation of HCM- and DCM-associated mutations.

|          | 'Normal' myocardium                  | Ile284Val (HCM)                        | Asp230Asn (DCM)                       |
|----------|--------------------------------------|----------------------------------------|---------------------------------------|
| $N_M$    | 2.5·10 <sup>14</sup> m <sup>-2</sup> | 1.08·10 <sup>14</sup> /m <sup>-2</sup> | 2.5·10 <sup>14</sup> /m <sup>-2</sup> |
| $c_{50}$ | 1                                    | 0.55                                   | 1.85                                  |
| $m$      | 3                                    | 3                                      | 2                                     |
| $k_s$    | 2                                    | 0.5                                    | 2                                     |

Table S5. Geometrical parameters of the normal LV and the LVs with cardiomyopathy.

| Parameter      | Normal | HCM  | DCM  |
|----------------|--------|------|------|
| $r_{in}$ , cm  | 1.73   | 1.5  | 2    |
| $r_{out}$ , cm | 2.78   | 3.3  | 3.05 |
| $h_{in}$ , cm  | 6.93   | 6.85 | 7.25 |
| $h_{out}$ , cm | 7.68   | 8.2  | 8    |

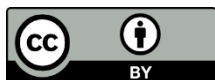

© 2020 by the authors. Submitted for possible open access publication under the terms and conditions of the Creative Commons Attribution (CC BY) license (<http://creativecommons.org/licenses/by/4.0/>).
